# Supplementary material for: Exogenous treatment with N-acetylglutamic acid confers tolerance to heat stress in plants
Source: PubMed Central journal article supplement (PMC11500599; doi:10.5511/plantbiotechnology.23.1211a), 2024-03-25
Supplement: plantbiotechnology-41-1-23.1211a-s001.pdf [file plantbiotechnology-41-1-23.1211a-s001.pdf]

Supplementary Table S1. List of primers used in this study.

| Name         | Sequence (5' → 3')     | Experiment |
|--------------|------------------------|------------|
| ACTIN2_RT_F  | GATCTCCAAGGCCGAGTATGAT | qPCR       |
| ACTIN2_RT_R  | CCCATTTCATAAAACCCCAGC  | qPCR       |
| HSFA2_F      | ATCAGCAAGGATCTGGGATG   | qPCR       |
| HSFA2_R      | CCTCAGCTACAAGCACACCA   | qPCR       |
| HSP21_F      | CAGGGCTCAAGACCAGAGAG   | qPCR       |
| HSP21_R      | TCCCTTTTTGTTGTCCTTGC   | qPCR       |
| HSP22_R      | GACTCGAGAGGGACACAAGC   | qPCR       |
| HSP22_R      | TGCCCTTCTGCTGTTTCTTT   | qPCR       |
| HSP17.6A_F   | ACCAGCTGACGTTATCGAGCA  | qPCR       |
| HSP17.6A_R   | CACCACAAGCACGTTCTCGTT  | qPCR       |
| HSP18.2_F    | TCCAAGCATTTTTGGAGGAC   | qPCR       |
| HSP18.2_R    | TTTGTAACGCTGCCACATC    | qPCR       |
| TA3_ChIP_F   | CTGCGTGGAAGTCTGTCAA    | ChIP-qPCR  |
| TA3_ChIP_R   | CTATGCCACAGGGCAGTTTT   | ChIP-qPCR  |
| HSFA2_ChIP_F | TCCACGCCTCAATCTCTCAAC  | ChIP-qPCR  |
| HSFA2_ChIP_R | TGGGTTTTGGGTAAAGTTTGCG | ChIP-qPCR  |

**A**

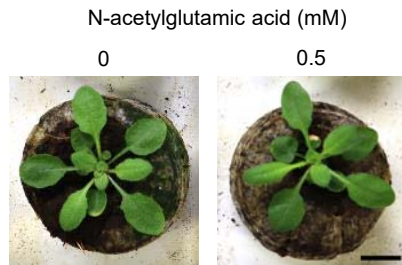

**B**

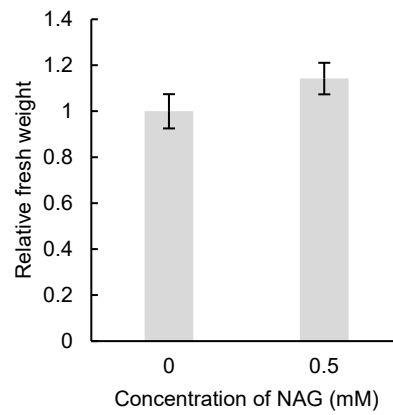

Supplementary Figure S1. Exogenous treatment with N-acetylglutamic acid does not affect the growth of Arabidopsis in soil planting.

(A) Arabidopsis seedlings treated with 0.5 mM N-acetylglutamic acid (NAG) in soil planting under normal conditions (22 °C, 16 h light / 8 h dark). Scale bar: 1 cm. (B) Fresh weight of seedlings treated with 0.5 mM NAG in soil planting under normal conditions. The fresh weight of NAG-treated seedlings was compared to that of untreated seedlings. Error bars indicate standard error. n = 30.

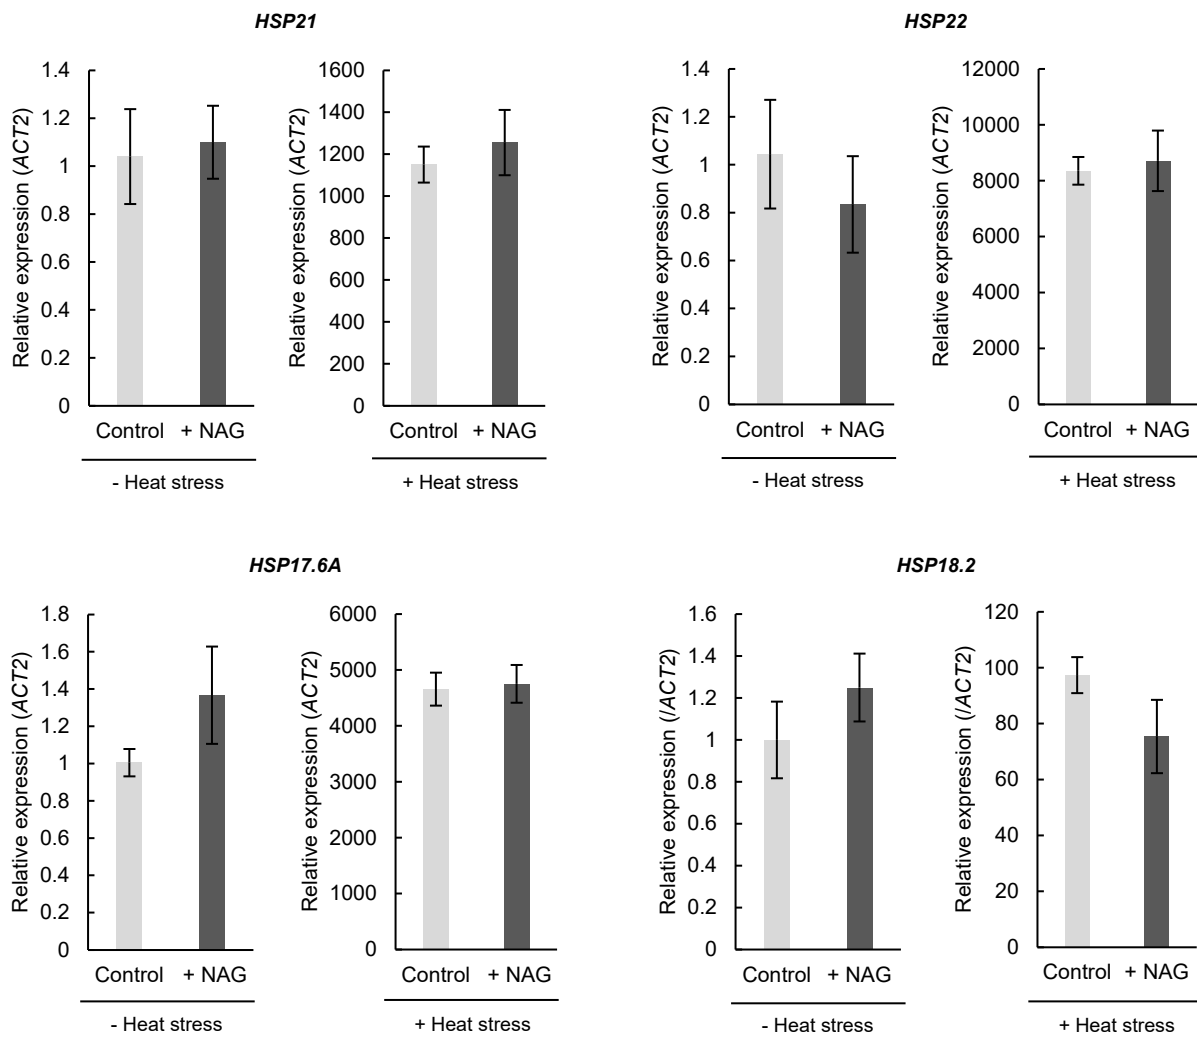

Supplementary Figure S2. Expression levels of *HSP21*, *HSP22*, *HSP17.6A* and *HSP18.2* in plants treated with NAG under both non-heat stress and heat stress.

Expression levels of *HSP21*, *HSP22*, *HSP17.6A* and *HSP18.2* in *Arabidopsis* seedlings treated with 0.1 mM N-acetylglutamic acid (NAG) for 2 h, with or without heat stress (44 °C, 1 h). Error bars indicate standard error. n = 3.
